# Supplementary material
Source: PubMed Central journal article supplement (PMC2764299)
Supplement: NIHMS76237-supplement-01.pdf [file NIHMS76237-supplement-01.pdf]

**S1:** Raw Affymetrix gene expression scores. **Excel spreadsheet**

**S2:** Gene function binning, intensity plots, and relative glucose-regulated gene expression in wild type and *Atrgs1* mutant seedlings. **PDF**

**S3.** Comparison of the response of transcripts levels of genes involved in metabolism to addition of 100 mM glucose in wild-type seedlings and *Atrgs1-1*. **PDF**
